# Supplementary material for: Latent track formation and recrystallization in swift heavy ion irradiation
Source: Royal Society of Chemistry journal article supplement (doi:10.1039/d2cp04061a), 2022-01-01
Supplement: d2cp04061a1.pdf [file d2cp04061a1.pdf]

## Supplementary Material

### Latent Track Formation and Recrystallization in Swift Heavy Ion Irradiation

Hamed Attariani<sup>†</sup>

<sup>†</sup>Department of Mechanical and Materials Engineering, Wright State University, Dayton, OH  
45431, USA

\*Corresponding Author: [hamed.attariani@wright.edu](mailto:hamed.attariani@wright.edu), Tell: (937) 775-8320, Fax: (419) 586-0320

Table S1. Latent track radius in rutile TiO<sub>2</sub> for various ions.

| SHI         | Se (keV/nm) | R (nm) -<br>Experimental[1] | R (nm) –<br>Numerical<br>PF-i-TS | R (nm) –<br>Numerical<br>Classical i-<br>TS |
|-------------|-------------|-----------------------------|----------------------------------|---------------------------------------------|
| 23 MeV I    | 8.86        | 0                           | 0                                | 2                                           |
| 28 MeV I    | 10.94       | 0                           | 0                                | 4.5                                         |
| 84.5 MeV Cu | 13.6        | 1.5±0.4                     | 1.66                             | 5                                           |
| 79 MeV Br   | 15.2        | 2.4±1.2                     | 2.9                              | 5.33                                        |
| 115 MeV Br  | 16.1        | 3.8±0.4                     | 3.42                             | 5.8                                         |

**References:**

- [1] K. Awazu, X. Wang, M. Fujimaki, T. Komatsubara, T. Ikeda, Y. Ohki, J Appl Phys 100 (2006) 044308.
